# Supplementary material
Source: PubMed Central journal article supplement (PMC9160085)
Supplement: 41422_2022_627_MOESM1_ESM.pdf [file 41422_2022_627_MOESM1_ESM.pdf]

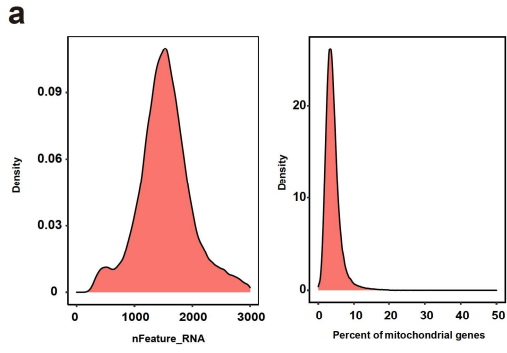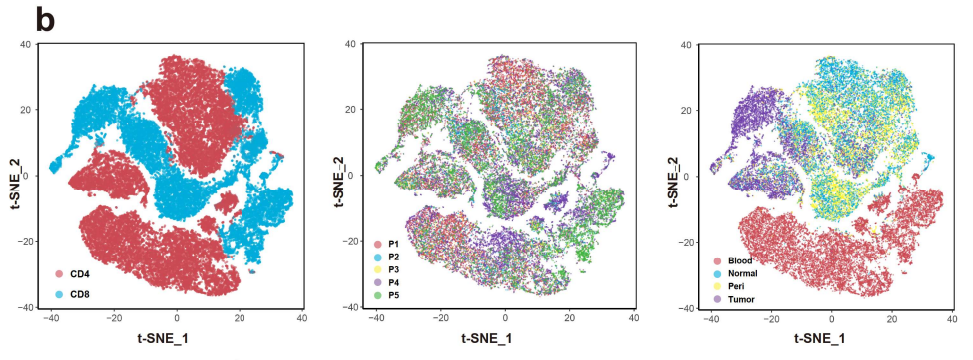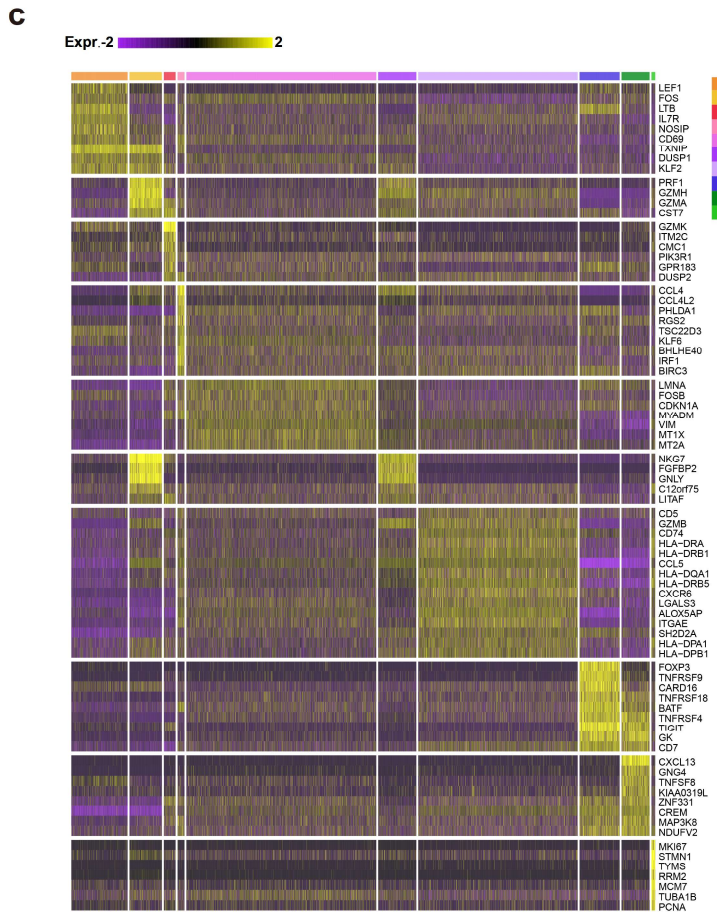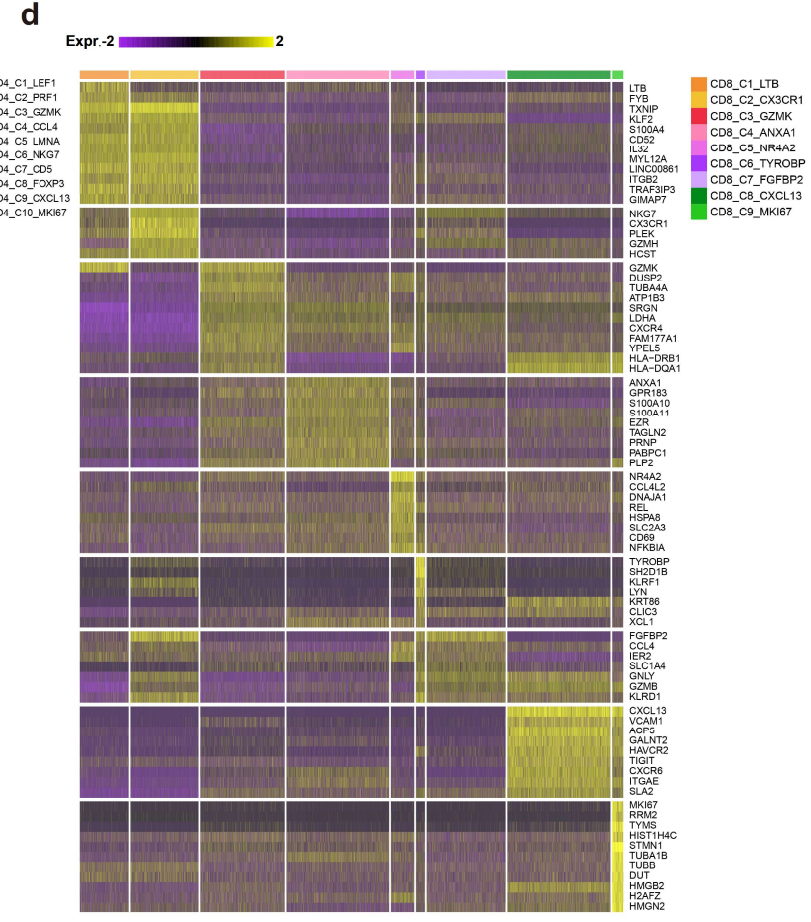

**Supplementary information, Fig. S1: ScRNA-seq data quality and features of subclusters.** **a**, Histograms of percent of UMI and mitochondrial genes. **b**, t-SNE projection of T cells that are color-coded for CD4<sup>+</sup> and CD8<sup>+</sup> cell type (left), patient source (middle), and tissue type (right). **c**, Heatmap showing differentially expressed genes between the nine clusters of expanded CD8<sup>+</sup> T cells. **d**, Heatmap showing differentially expressed genes between the ten clusters of expanded CD4<sup>+</sup> T cells.
