# Supplementary material
Source: PubMed Central journal article supplement (PMC9160085)
Supplement: 41422_2022_627_MOESM2_ESM.pdf [file 41422_2022_627_MOESM2_ESM.pdf]

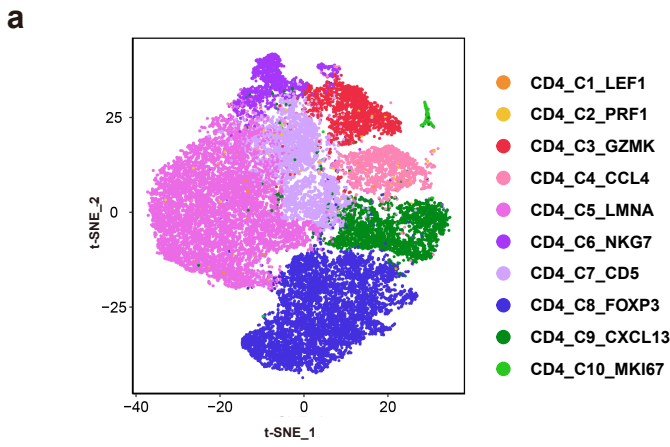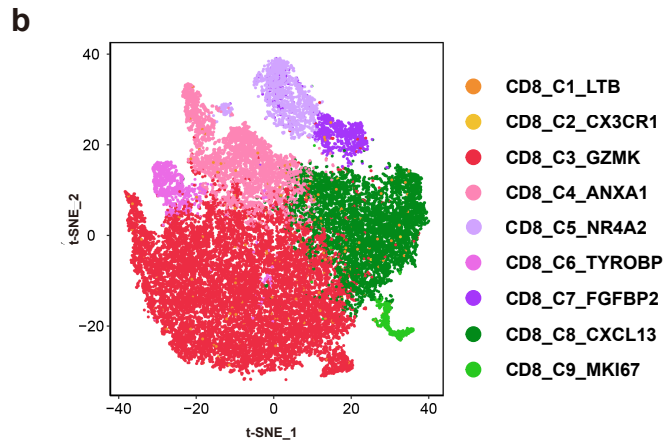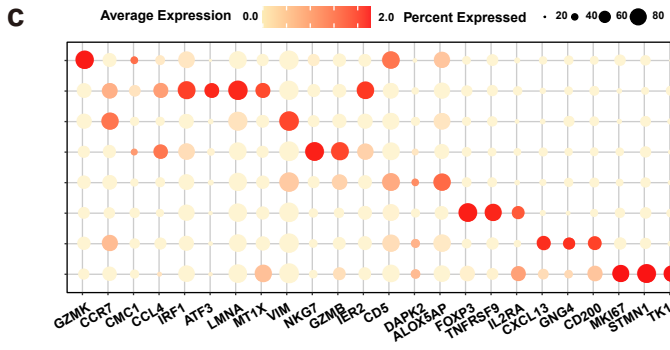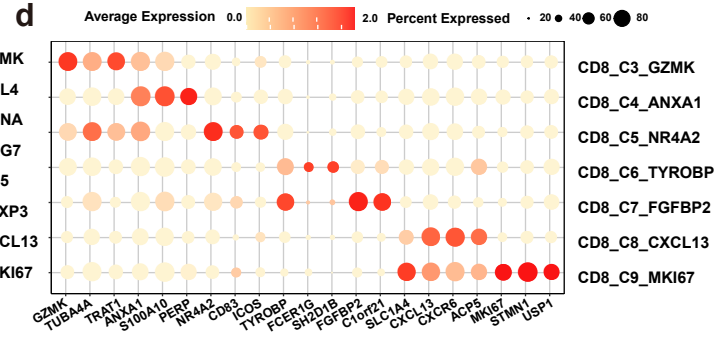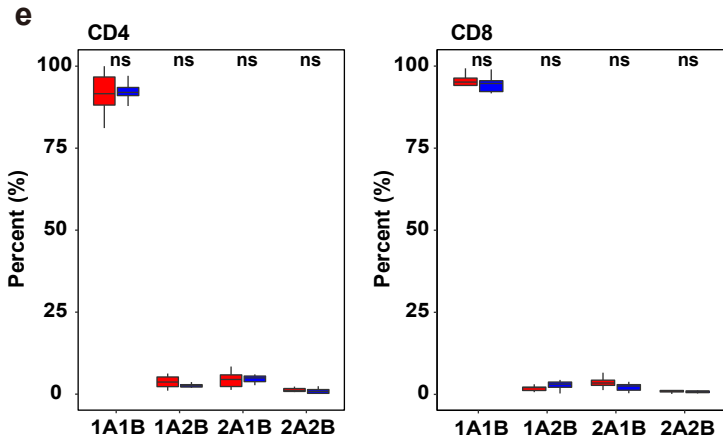

**Supplementary information, Fig. S2: Clustering and evolutionary analysis of all T cells.** **a**, t-SNE projection of all CD4<sup>+</sup> T cells from tumors of the ten patients using specific marker genes of the nine clusters identified in expanded CD4<sup>+</sup> T cells. **b**, t-SNE projection of all CD8<sup>+</sup> T cells from tumors of the ten patients using specific marker genes of the ten clusters identified in expanded CD8<sup>+</sup> T cells. **c**, Dot plot showing the expression of marker genes of the expanded CD4 clusters in the clusters of all tumor T cells from the 10 patients. **d**, The expression of marker genes of the expanded CD8 clusters in the clusters of all tumor T cells from the 10 patients. **e**, The frequencies of the four types of TCRs (1 $\alpha$ 1 $\beta$ , 1 $\alpha$ 2 $\beta$ , 2 $\alpha$ 1 $\beta$ , and 2 $\alpha$ 2 $\beta$ ) in CD4<sup>+</sup>CXCL13<sup>+</sup>, CD4<sup>+</sup>CXCL13<sup>-</sup>, CD8<sup>+</sup>CXCL13<sup>+</sup>, and CD8<sup>+</sup>CXCL13<sup>-</sup> T cells of the 10 patients.
