# Supplementary material
Source: PubMed Central journal article supplement (PMC9160085)
Supplement: 41422_2022_627_MOESM3_ESM.pdf [file 41422_2022_627_MOESM3_ESM.pdf]

Cancer Type

CD4+ T cells

CD8+ T cells

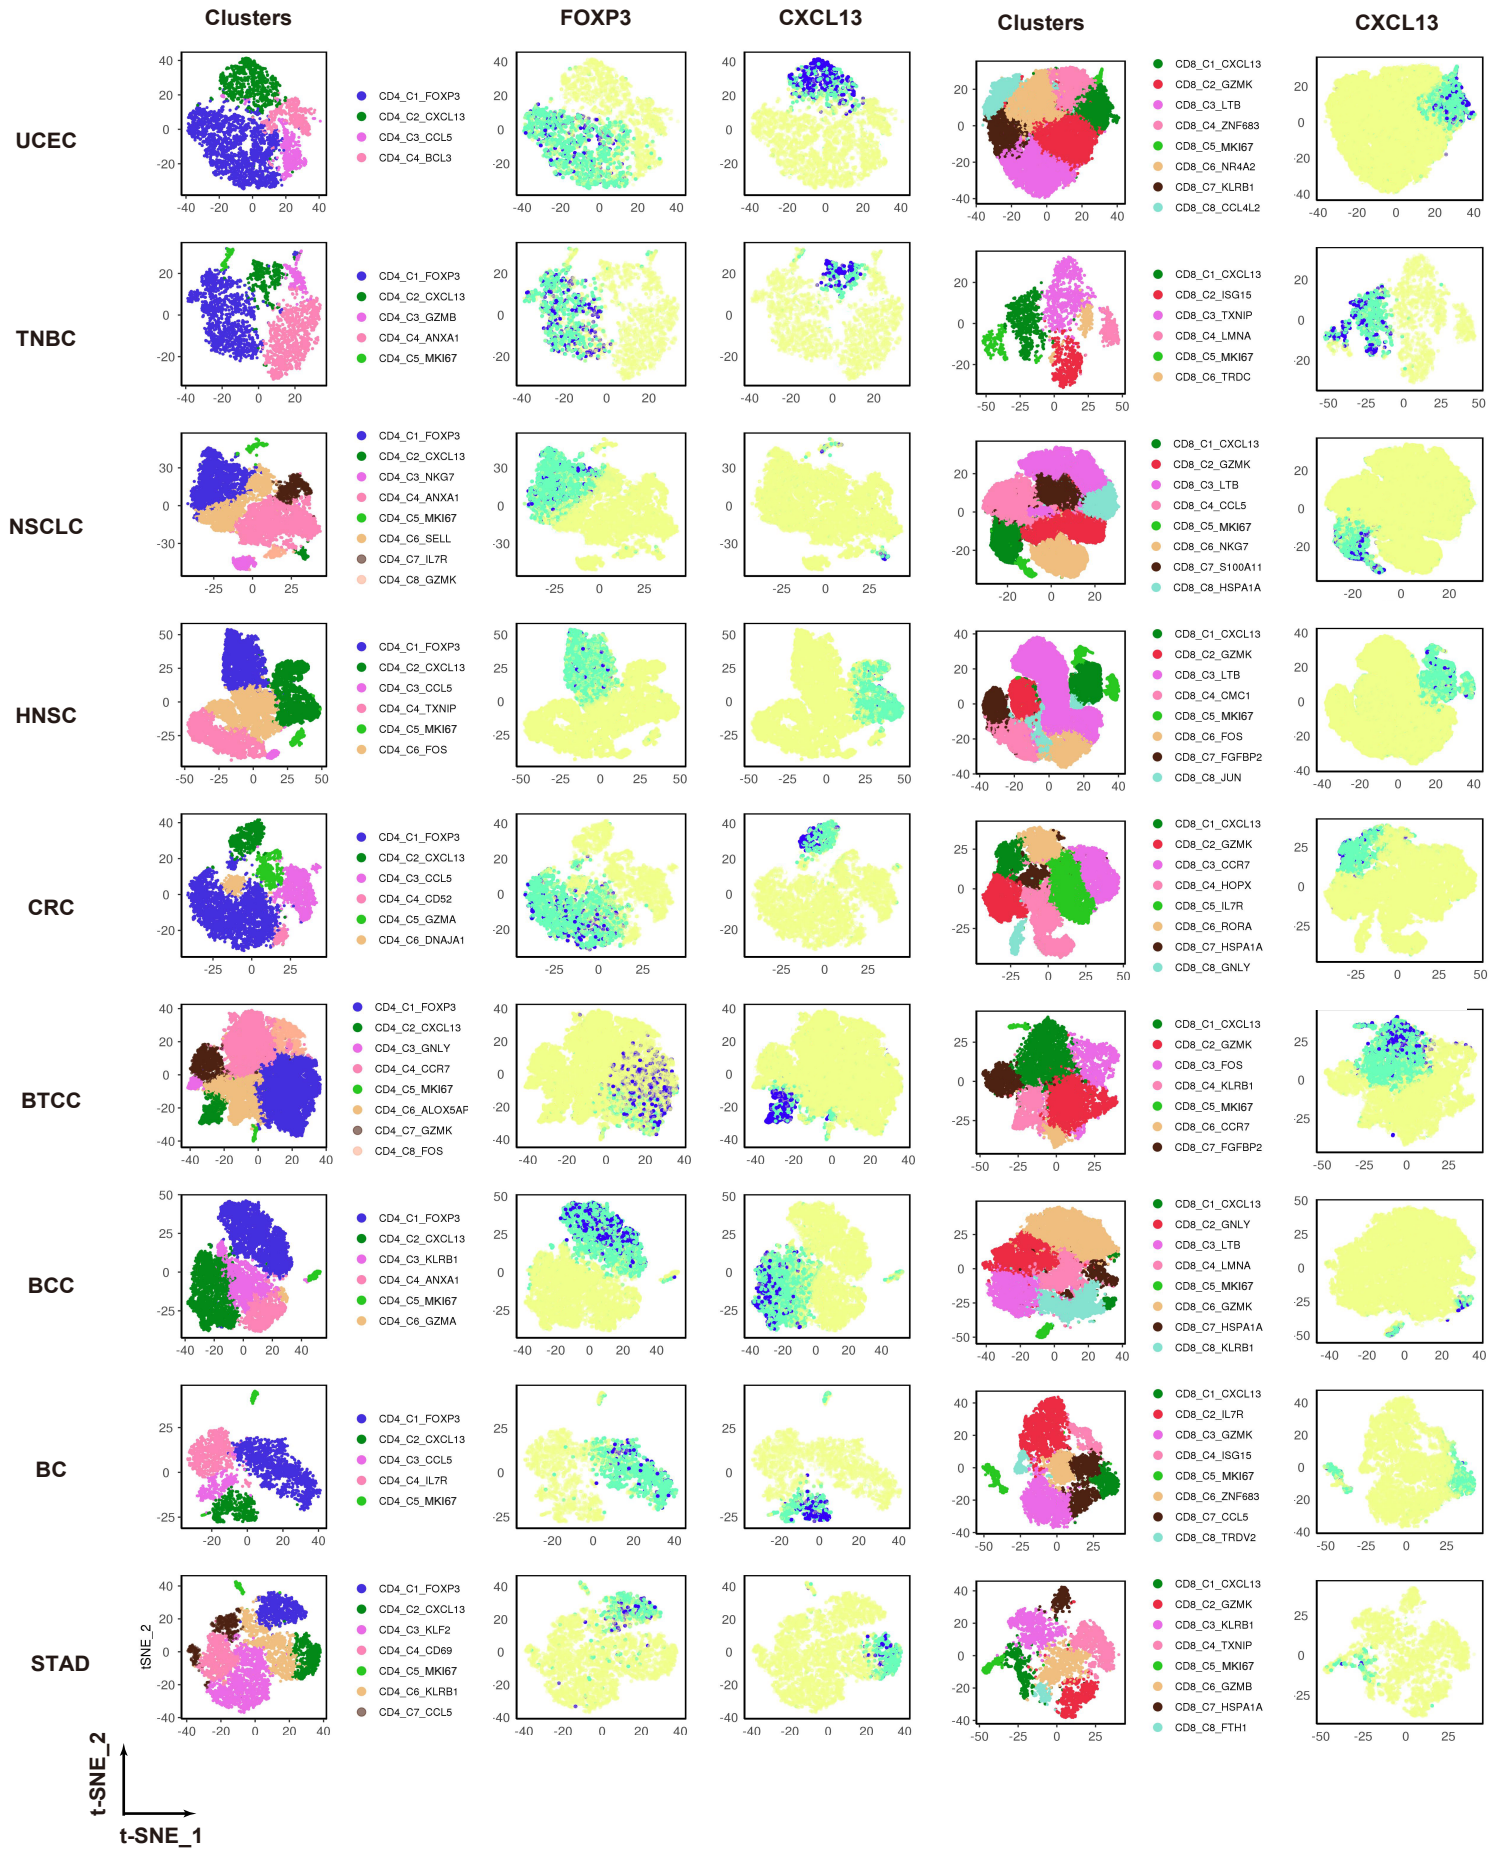

**Supplementary information, Fig. S3: Tas cells present in different cancer types.** t-SNE projection showing CD4<sup>+</sup> T cells and CD8<sup>+</sup> T cells in Uterine Corpus Endometrial Carcinoma (UCEC), triple negative breast cancer (TNBC), non-small cell lung cancer (NSCLC), head and neck squamous cell carcinoma (HNSC), carcinoma of colon and rectum (CRC), bladder cancer (BTCC), basal cell carcinoma (BCC), breast cancer (BC), and stomach adenocarcinoma (STAD). Color-coded for cell clusters, CXCL13 gene expression, and FOXP3 gene expression, respectively.
