# Supplementary material
Source: PubMed Central journal article supplement (PMC9160085)
Supplement: 41422_2022_627_MOESM4_ESM.pdf [file 41422_2022_627_MOESM4_ESM.pdf]

**a**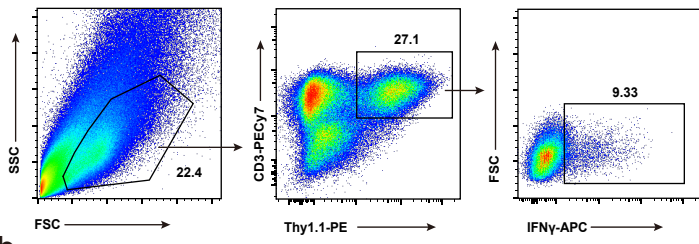**b**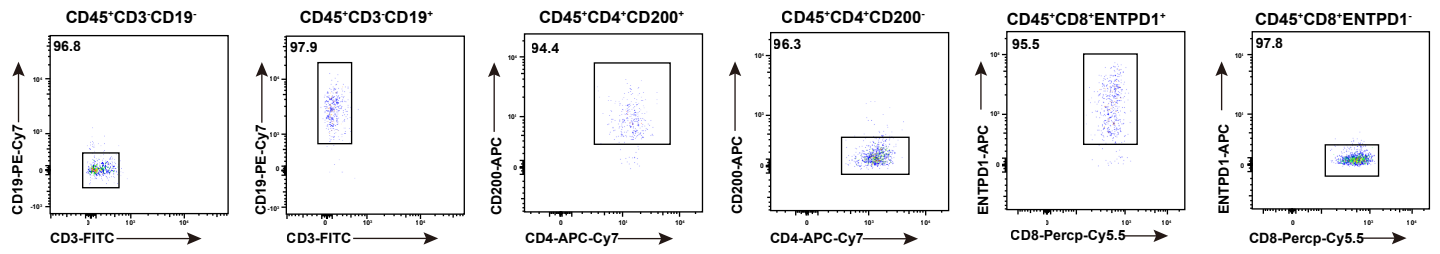

**Supplementary information, Fig. S4: Gating strategy of FACS. a,** FACS gating strategy of TCR-T cells stimulated with LCLs. **b,** FACS gating strategy of the sorting of T cell subsets from patient tumor samples.
