# Supplementary material
Source: PubMed Central journal article supplement (PMC9160085)
Supplement: 41422_2022_627_MOESM5_ESM.pdf [file 41422_2022_627_MOESM5_ESM.pdf]

# Manufacture of Personalized TCR-T Cell Therapy (6weeks)

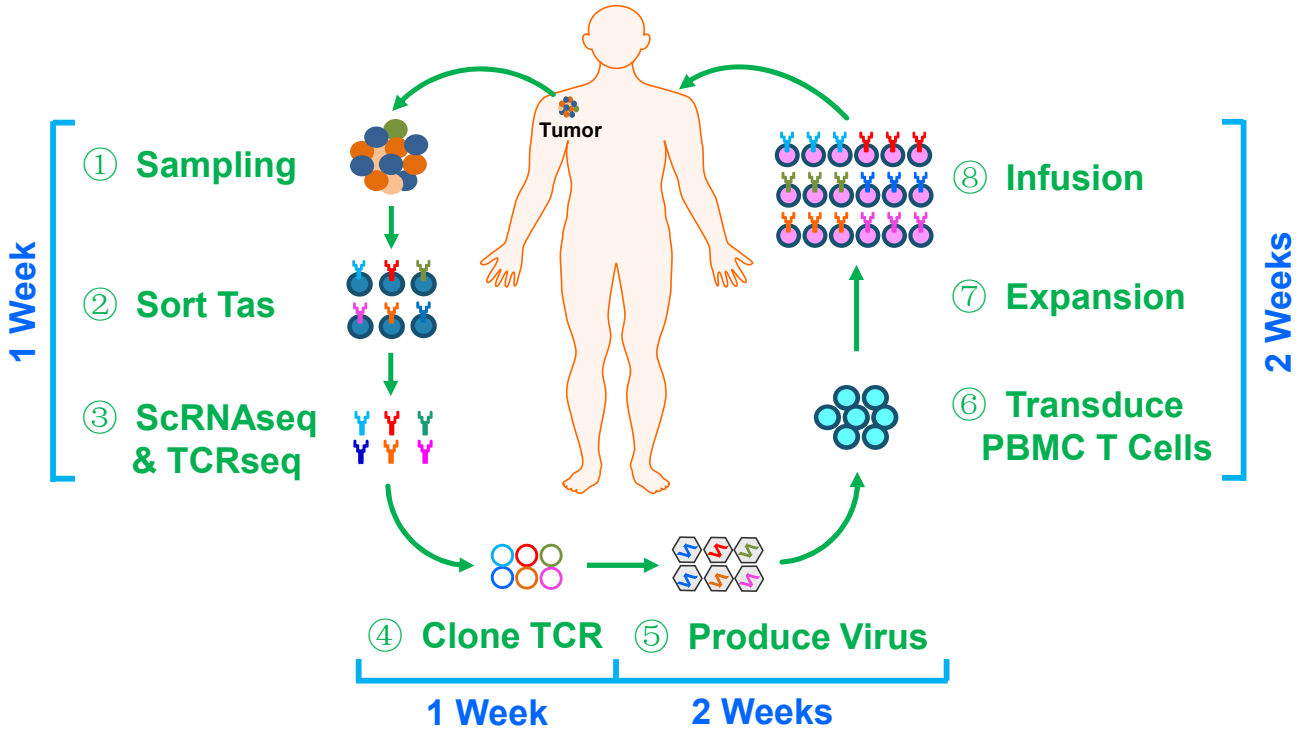

**Supplementary information, Fig. S5: Procedure of the manufacture of personalized TCR-T cell therapy.** Diagram of the timeline for the manufacture of the personalized TCR-T cell therapy.
